# Supplementary material for: Clinical Evaluation of a Quantitative Imaging Biomarker Supporting Radiological Assessment of Hippocampal Sclerosis
Source: Springer Nature journal article supplement (doi:10.1007/s00062-023-01308-9), 2023-06-26
Supplement: MOESM1 [file 25537162]

## Supplementary Materials for Clinical Evaluation of a Quantitative Imaging Biomarker supporting Radiological Assessment of Hippocampal Sclerosis

| Group                      | # Subjects | Mean age in years (range) | %Female |
|----------------------------|------------|---------------------------|---------|
| Epilepsy                   | 40         | 31.2 (10.4-62.3)          | 50.0%   |
| HS negative                | 27         | 28.9 (10.4-62.3)          | 63.0%   |
| Hippocampal Sclerosis (HS) | 13         | 36.0 (15.5-57.5)          | 23.1%   |
| left                       | 5          | 39.7 (15.5-57.5)          | 20.0%   |
| right                      | 7          | 33.6 (18.8-55.5)          | 28.6%   |
| bilateral                  | 1          | 34.2 (34.2-34.2)          | 0.0%    |

Table S1: Demographic information for the patient cohort. Indented groups show a subset of parent line.

**Hippocampal Sclerosis / MTS**

No     Yes: Left     Yes: Right     Yes: Bilateral

How confident are you with the decision?

Not at all  1     2     3     4     5 Very confident

---

**Hippocampal Volume**

Normal     l > r     l < r

Bilateral increased     Bilateral decreased

How confident are you with the decision?

Not at all  1     2     3     4     5 Very confident

---

**Amygdala Volume**

Normal     l > r     l < r

Bilateral increased     Bilateral decreased

How confident are you with the decision?

Not at all  1     2     3     4     5 Very confident

Figure S1: Form to record the assessments of the raters.

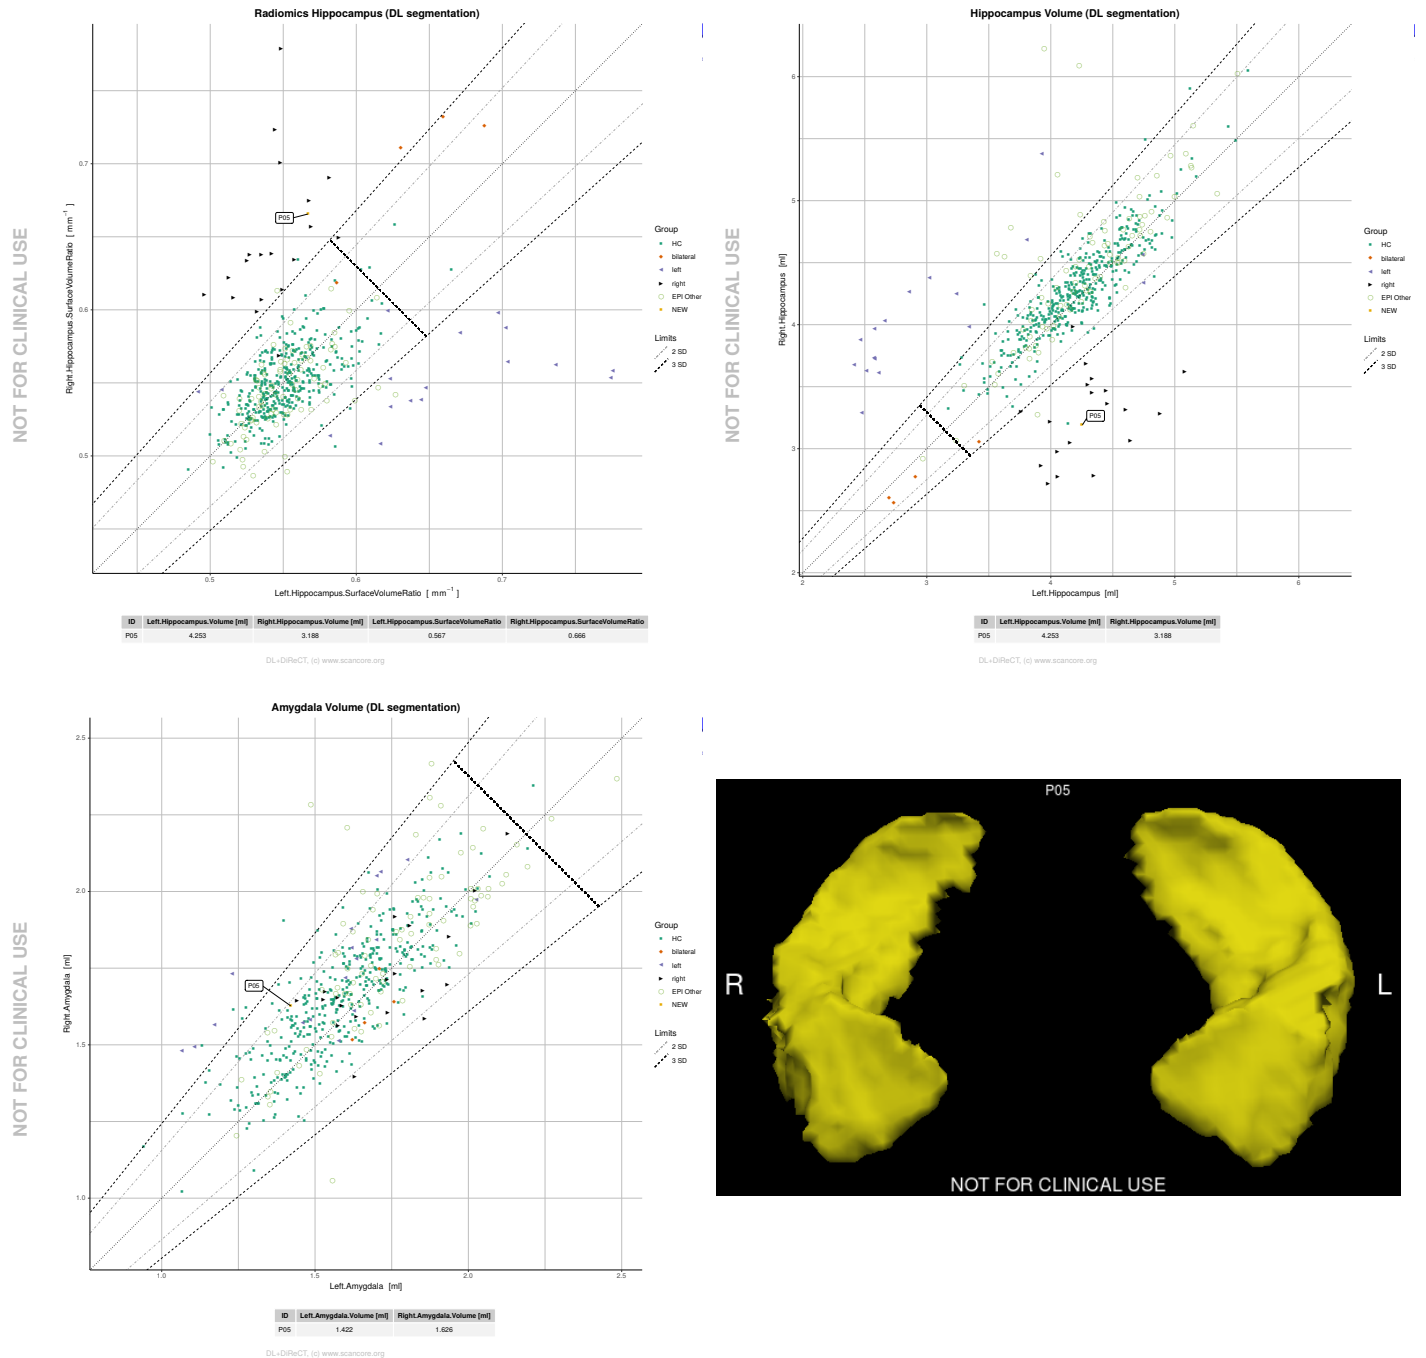

Figure S2: Sample quantitative report (QReport) from case *P05* comprising four pages. The surface-to-volume ratio of the hippocampi followed by the volumes of hippocampi and amygdalae and a 3D rendering of the hippocampi is shown. Measures from the left hemisphere on the x-axis are plotted against the right hemisphere (y-axis). The current case is highlighted respectively, while healthy controls (HC) and other epilepsy cases are shown as a reference along with exemplary cases of HS left/right/bilateral (these reference/exemplary cases are unrelated to the current study). Dashed lines represent two and three standard deviations (SD) of the healthy controls. In the primary plot of the surface-to-volume ratio, HC and epilepsy without HS tend to cluster along the diagonal while left-sided HS tend to appear in the lower right triangle, right-sided HS on the upper left, and the bilateral cases toward the upper right corner, indicating that in contrast to the volume, the surface-to-volume ratio increases in the presence of HS.

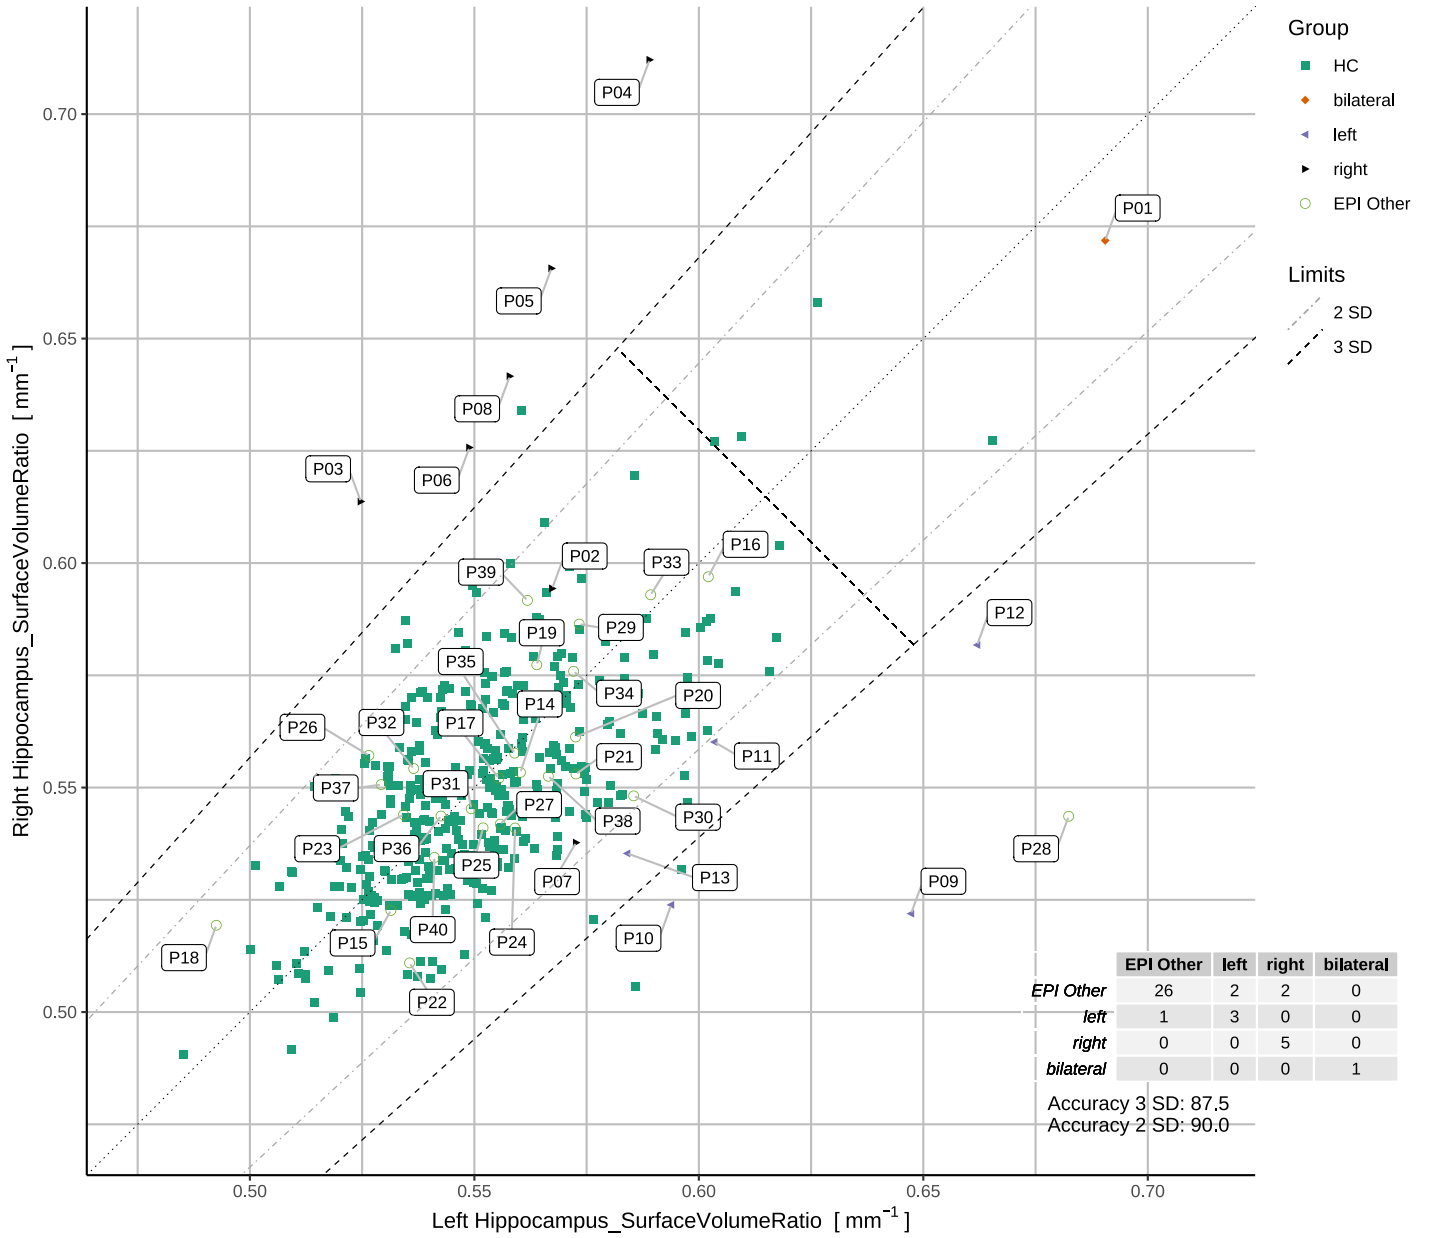

Figure S3: Report of surface-to-volume ratios of all 40 cases of the study. Symbols represent ground truth derived from clinical data and 7T imaging (HS left/right/bilateral or *EPI Other* for non-HS). The confusion matrix depicts predictions based on thresholding at three standard deviations (SD) in the rows vs. ground truth in the columns.

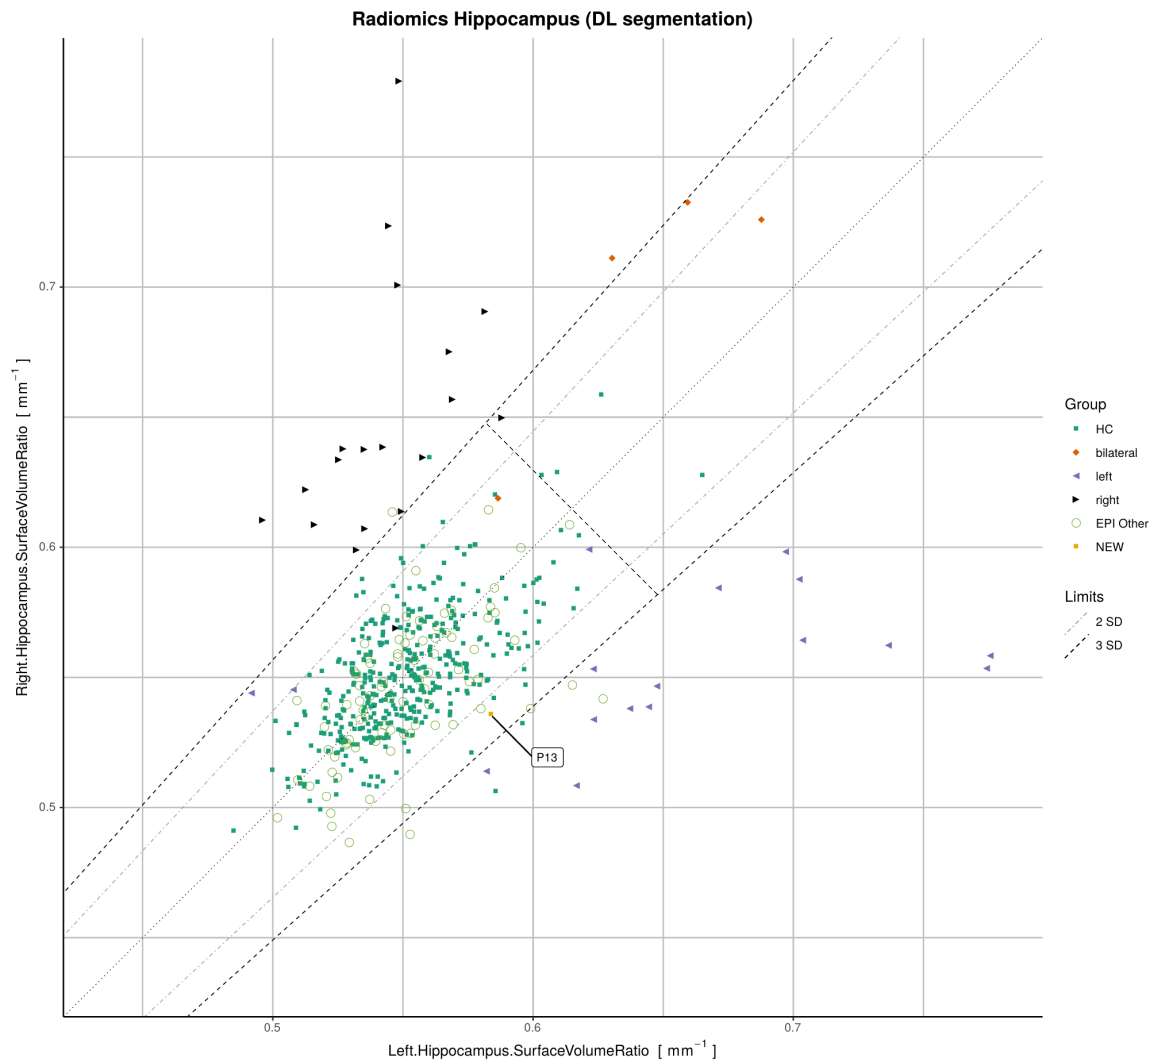

| ID  | Left.Hippocampus.Volume [ml] | Right.Hippocampus.Volume [ml] | Left.Hippocampus.SurfaceVolumeRatio | Right.Hippocampus.SurfaceVolumeRatio |
|-----|------------------------------|-------------------------------|-------------------------------------|--------------------------------------|
| P13 | 4.134                        | 4.129                         | 0.584                               | 0.535                                |

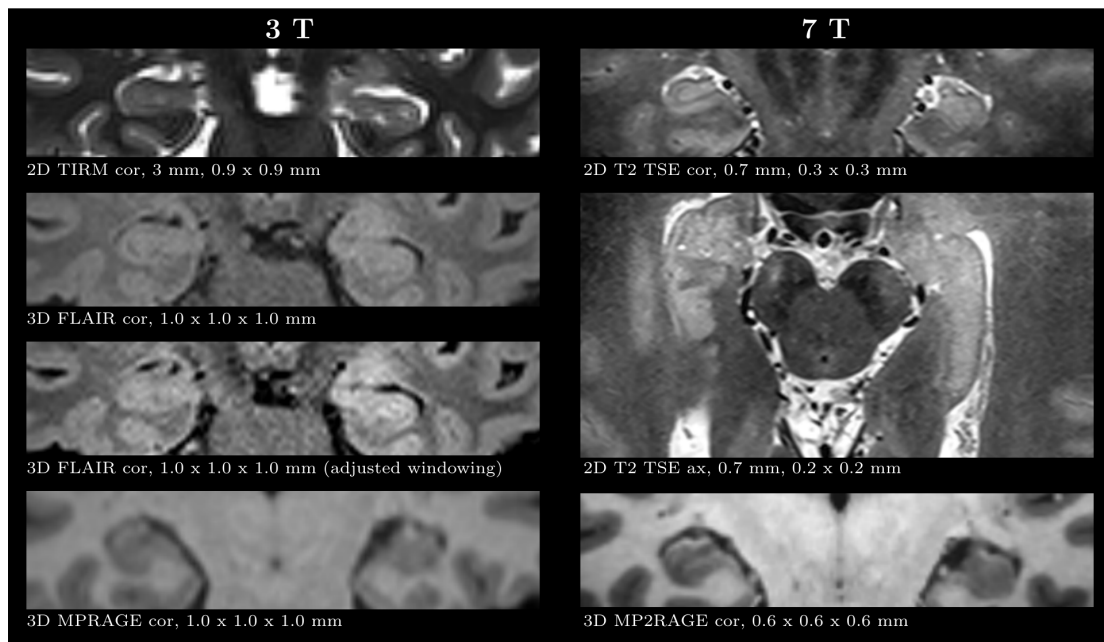

Figure S4: Example of patient *P13* with *HS left*. In the first round, 6/6 raters classified this case as *HS left*, whereas in the second round only 4/6 while the other two changed to *normal*, possibly because the QReport was between two and three standard deviations (SD). Case summary: A 50-year-old male patient with pharmacoresistant epilepsy with hippocampal sclerosis on the left and seizure onset in the left mesiotemporal region confirmed within phase I and phase II evaluation. The patient was referred to 7T MRI due to ambiguous findings on previous 3T MRI examinations and initially suspected autoimmune encephalitis, which could not be confirmed.

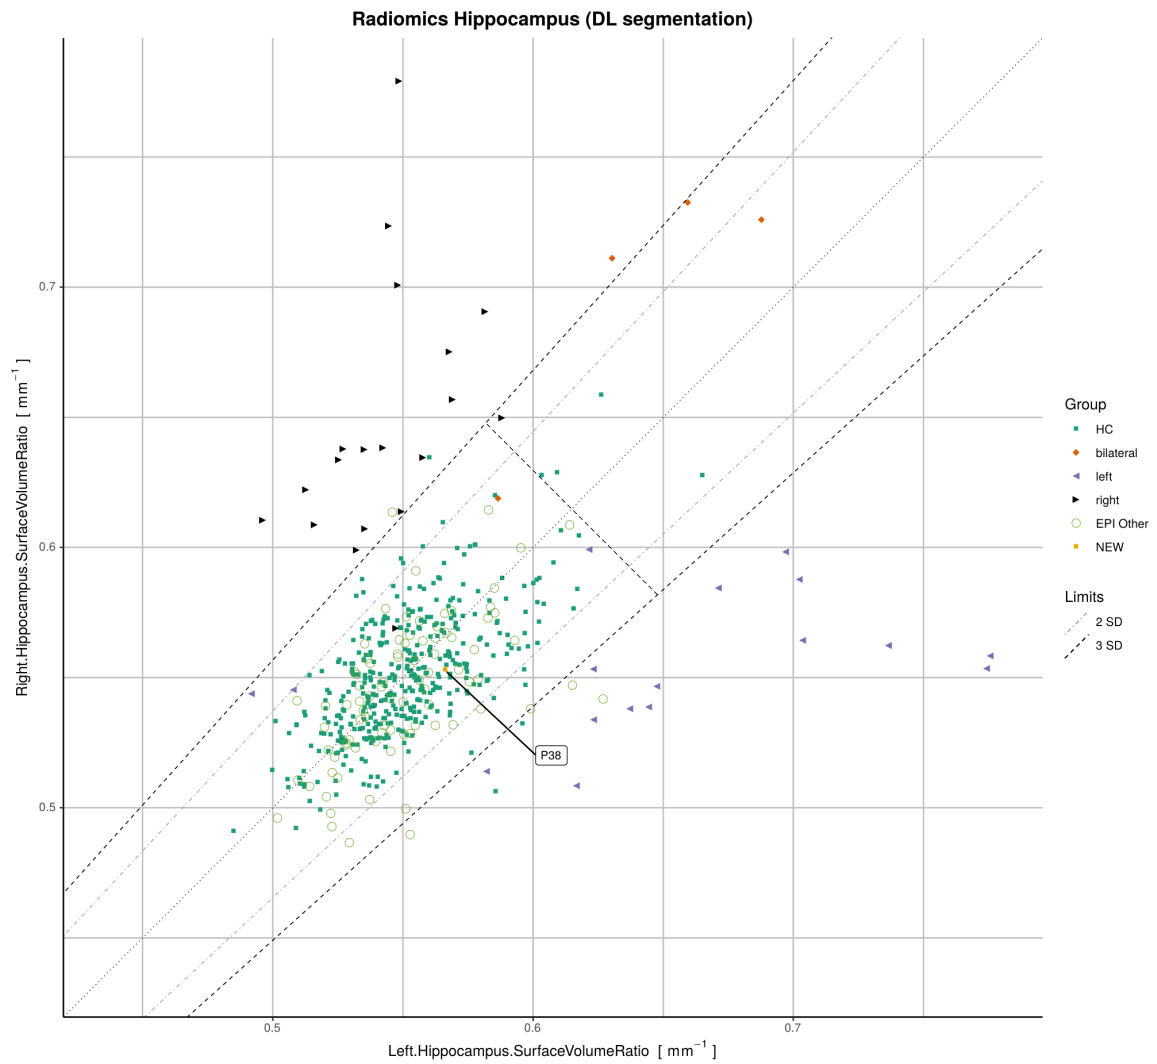

| ID  | Left.Hippocampus.Volume [ml] | Right.Hippocampus.Volume [ml] | Left.Hippocampus.SurfaceVolumeRatio | Right.Hippocampus.SurfaceVolumeRatio |
|-----|------------------------------|-------------------------------|-------------------------------------|--------------------------------------|
| P38 | 4.211                        | 4.443                         | 0.566                               | 0.553                                |

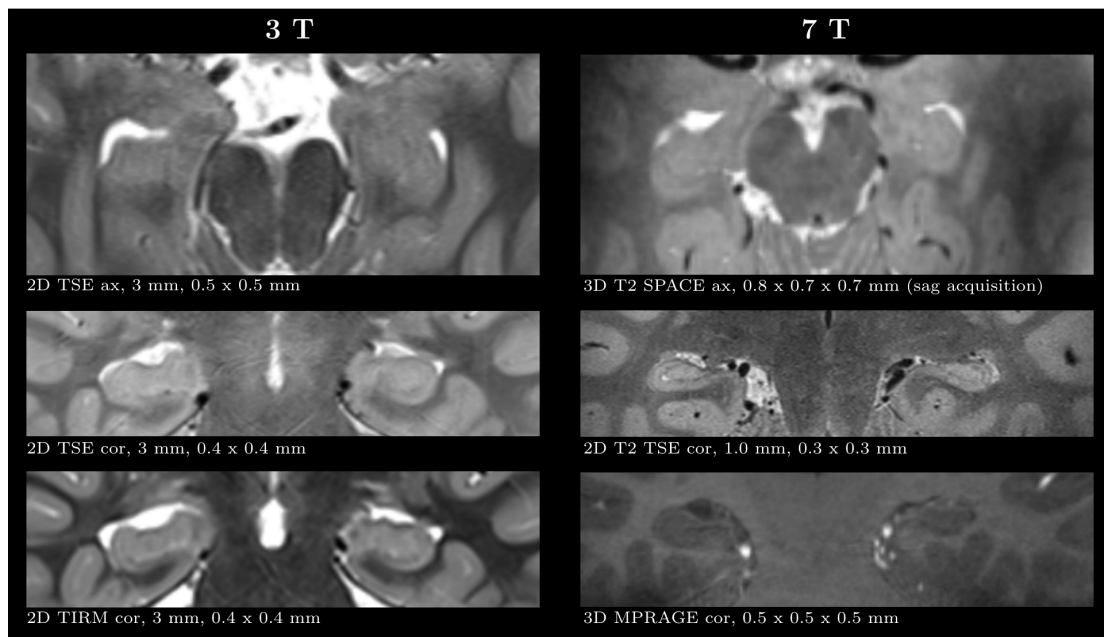

Figure S5: Example of patient *P38* without *HS*. In the first round, 3/6 raters classified this case as *HS right*, whereas in the second round all rated it as *normal*.

Case summary: A 13-year-old male patient with pharmacoresistant focal epilepsy. On FDG-PET a hypometabolic area in the right temporal region was suspected. The patient was referred to 7T MRI for further clarification. In the pre-surgical phase II evaluation including electrode placement in the right hippocampus and amygdala no seizure onset zone was localized.

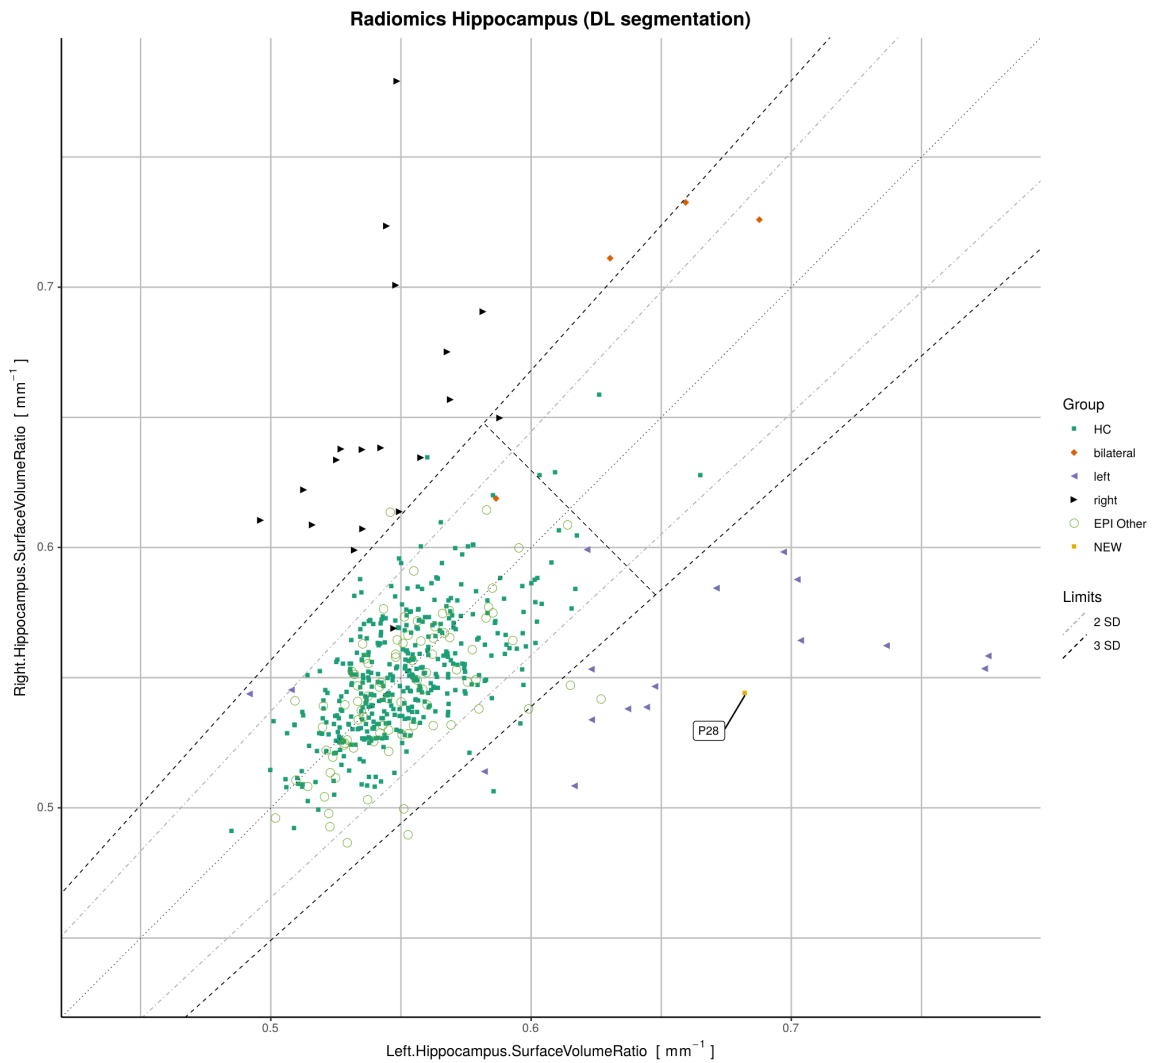

| ID  | Left.Hippocampus.Volume [ml] | Right.Hippocampus.Volume [ml] | Left.Hippocampus.SurfaceVolumeRatio | Right.Hippocampus.SurfaceVolumeRatio |
|-----|------------------------------|-------------------------------|-------------------------------------|--------------------------------------|
| P28 | 2.398                        | 4.465                         | 0.682                               | 0.544                                |

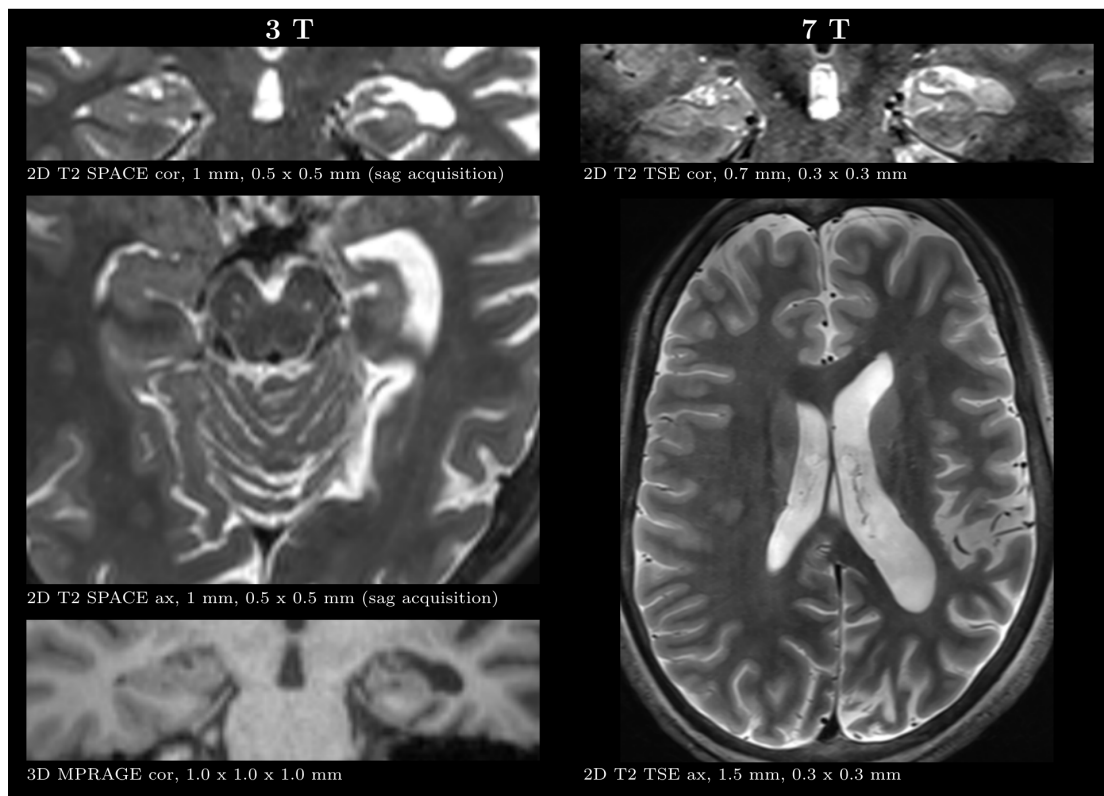

Figure S6: Example of patient *P28* without *HS*. In the first round, 6/6 raters classified this as *HS left*, whereas in the second round one rater changed to *normal*. Shortened MRI protocol due to non-compliance of the patient.

Case summary: A 13-year-old male patient with pharmacoresistant multifocal temporo-occipital epilepsy left. Referred for 7T MRI for pre-surgical evaluation with the intention of palliative surgery to reduce seizure frequency. The patient presented initially with B-cell Acute Lymphoblastic Leukemia without CNS involvement and received chemotherapy according to AIEOP-BFM protocol. Six months after the start of the treatment patient experienced PRES attributed to the treatment. In MRI follow-up after 6 months, severe parenchymal volume loss in the left hemisphere, including the mesio-temporal region was described.

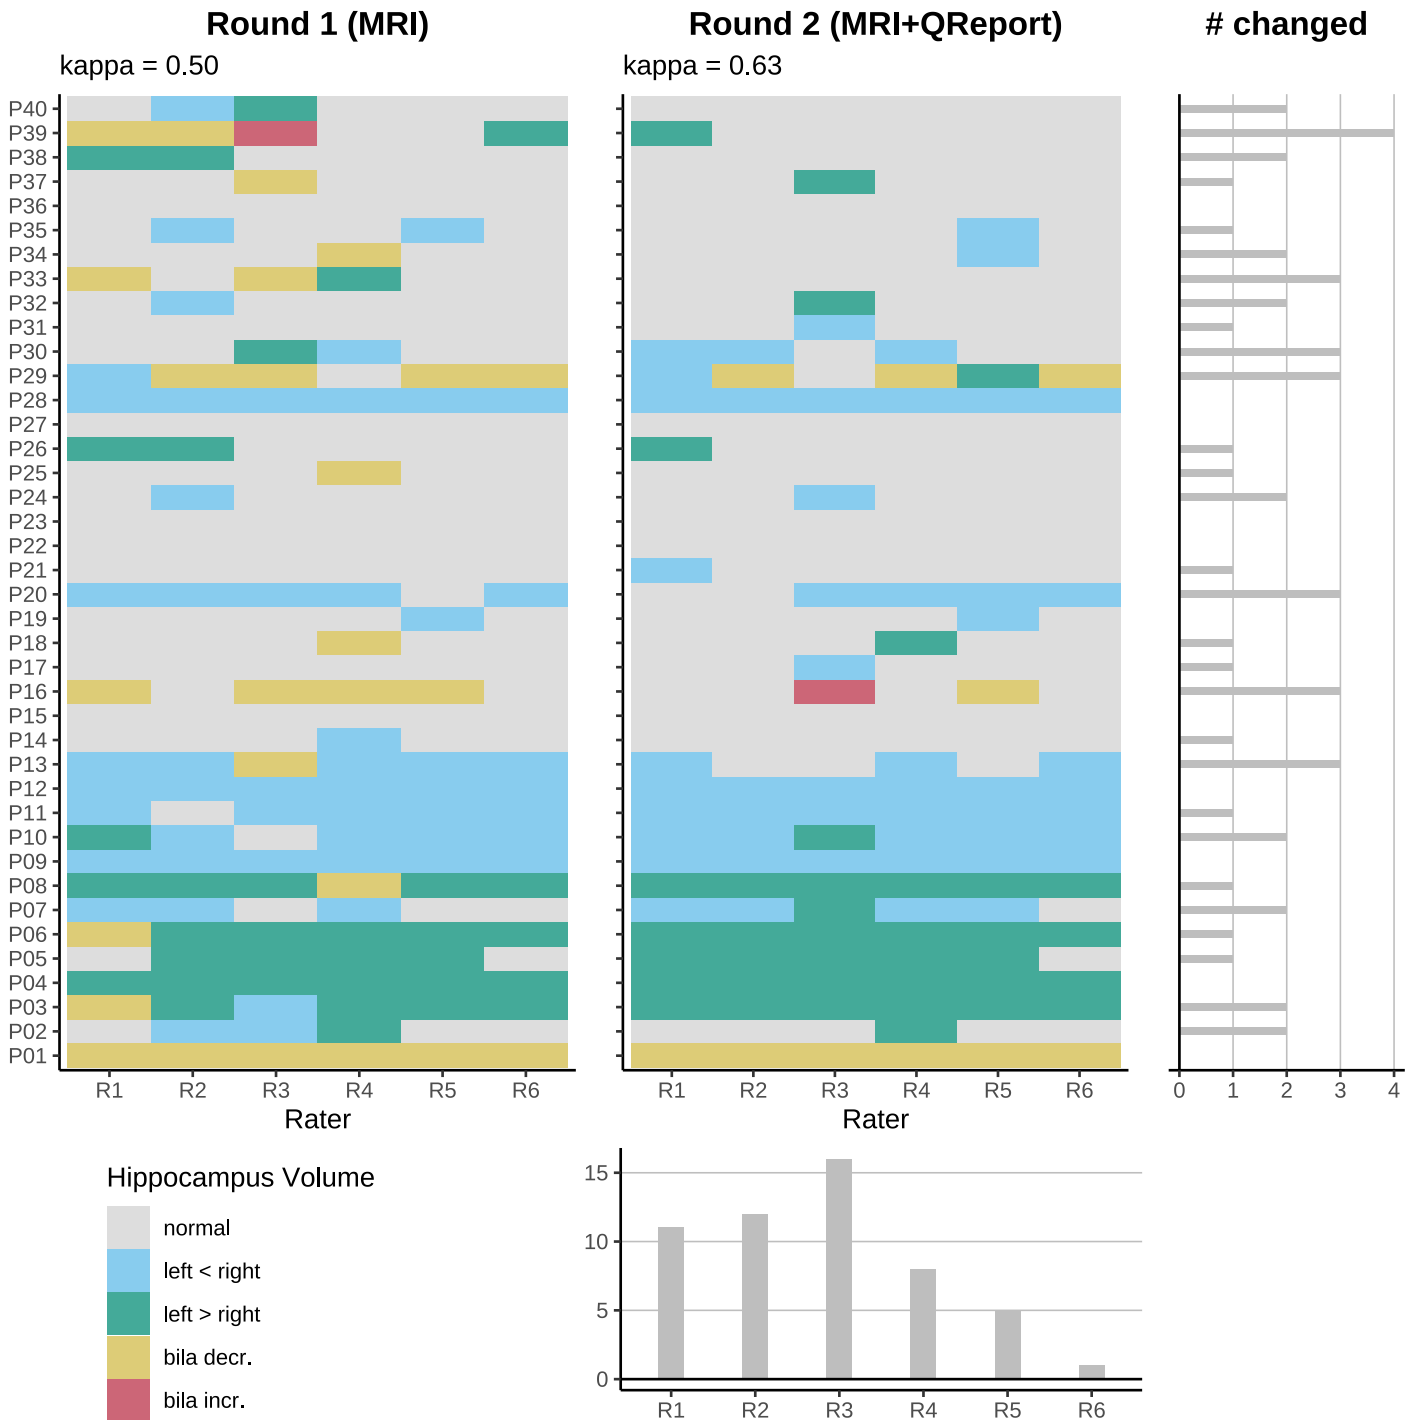

Figure S7: Visualization of all individual ratings (first two panels) for the **hippocampus volumes**. For each of the 40 cases, the number of times the raters changed their decision (# changed) is depicted. Corresponding changes per rater are shown below round 2. Neurologists (R1-R3) changed their decision more frequently than radiologists. Note: The cases were sorted by diagnosis to improve the clarity of this visualization but were presented to the raters in random order.

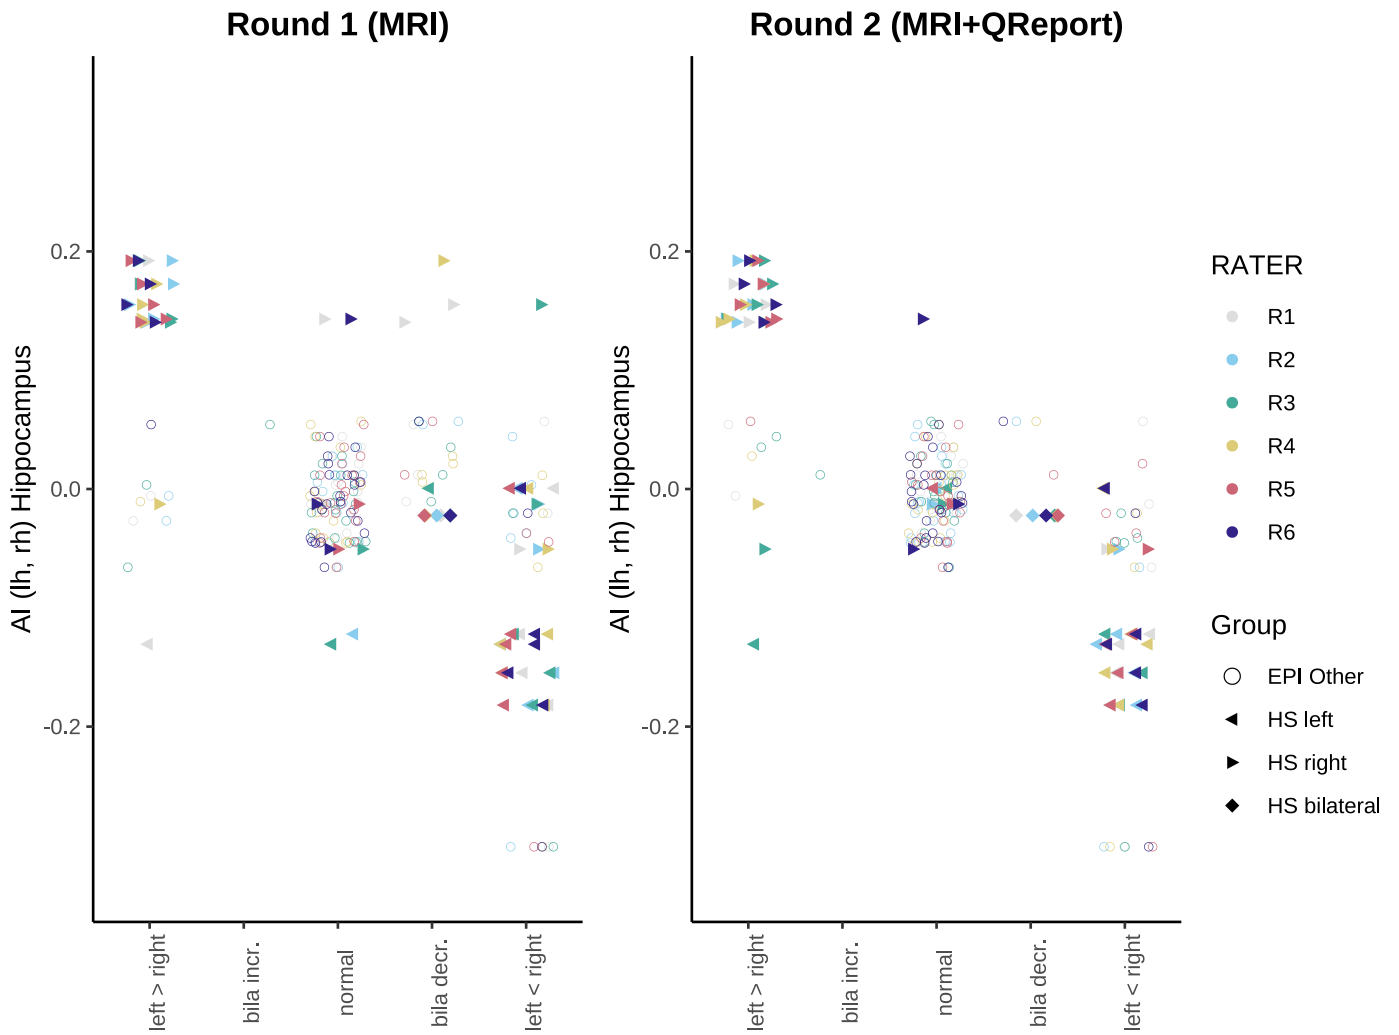

Figure S8: Ratings of the **hippocampus volumes** on the x-axis plotted against the asymmetry index (AI) on the y-axis. The symbols are shown with horizontal jitter for better readability.



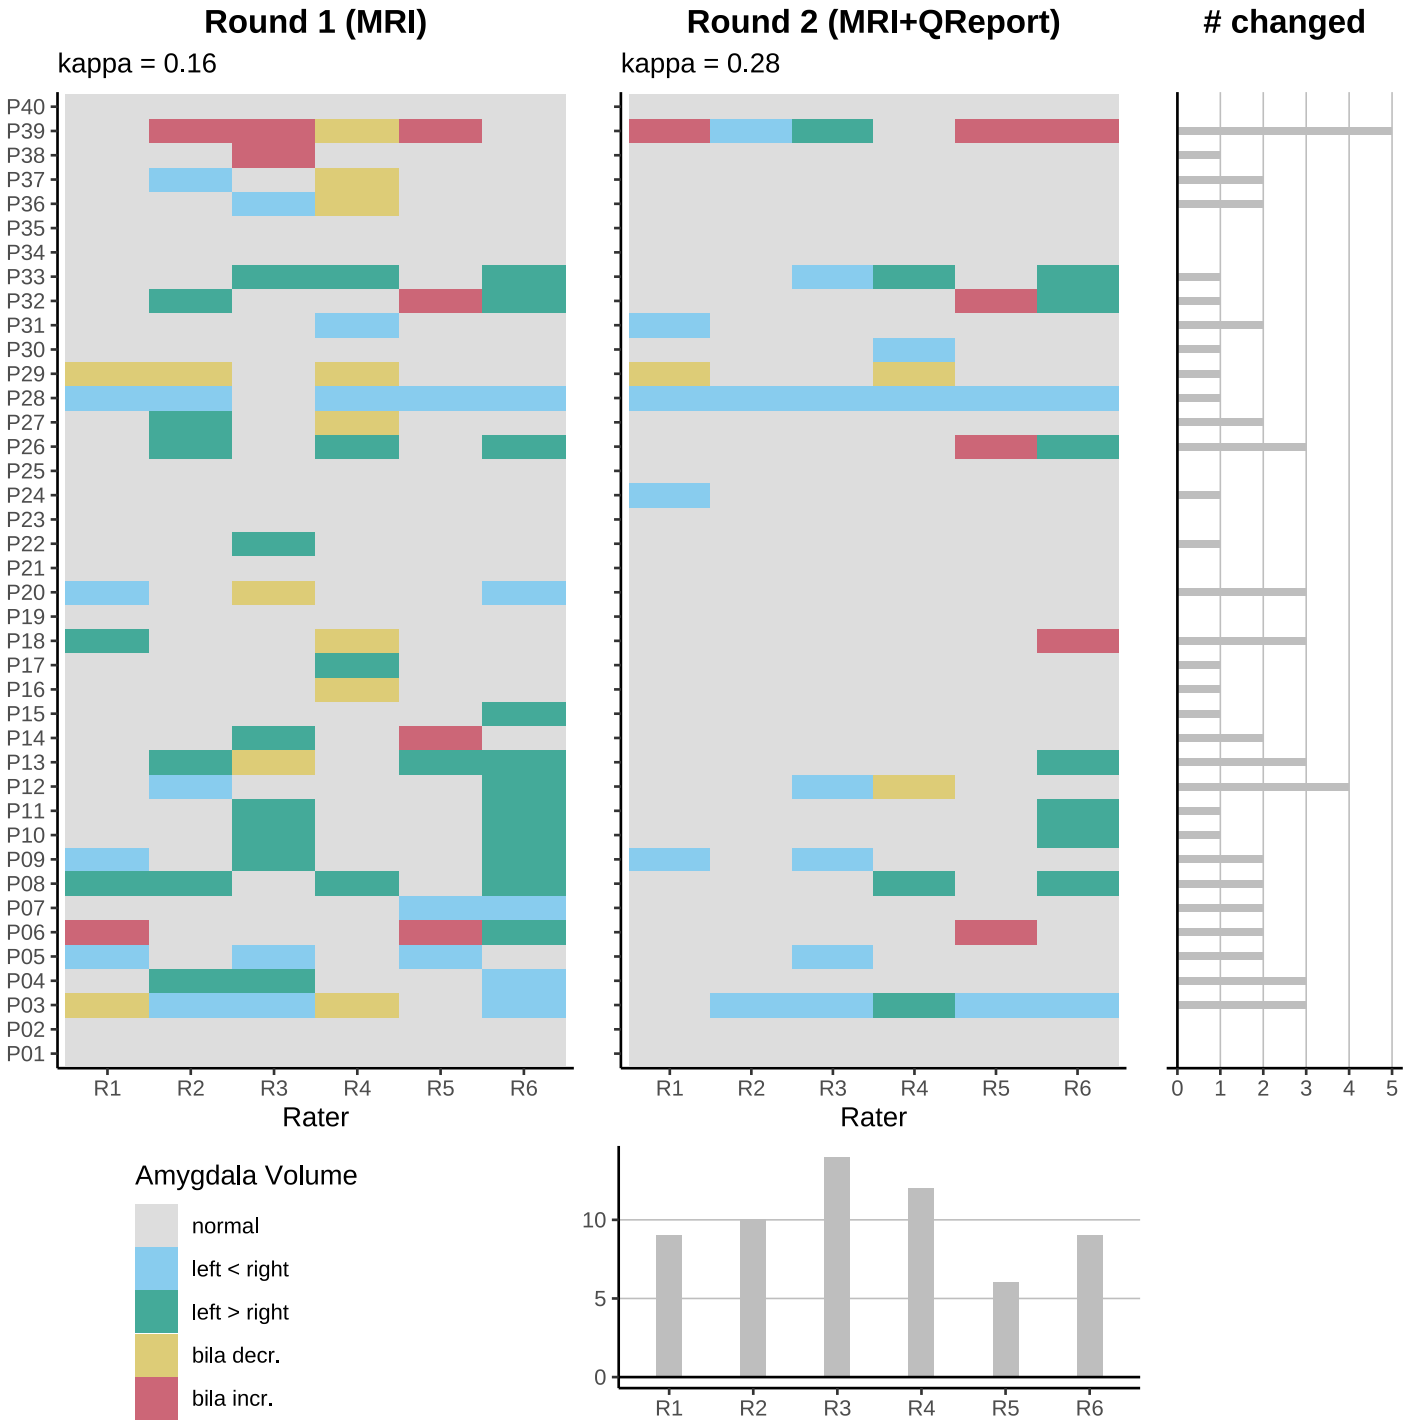

Figure S9: Visualization of all individual ratings (first two panels) for the **amygdala volumes**. For each of the 40 cases, the number of times the raters changed their decision (# changed) is depicted. Corresponding changes per rater are shown below round 2. Note: The cases were sorted by diagnosis to improve the clarity of this visualization but were presented to the raters in random order.

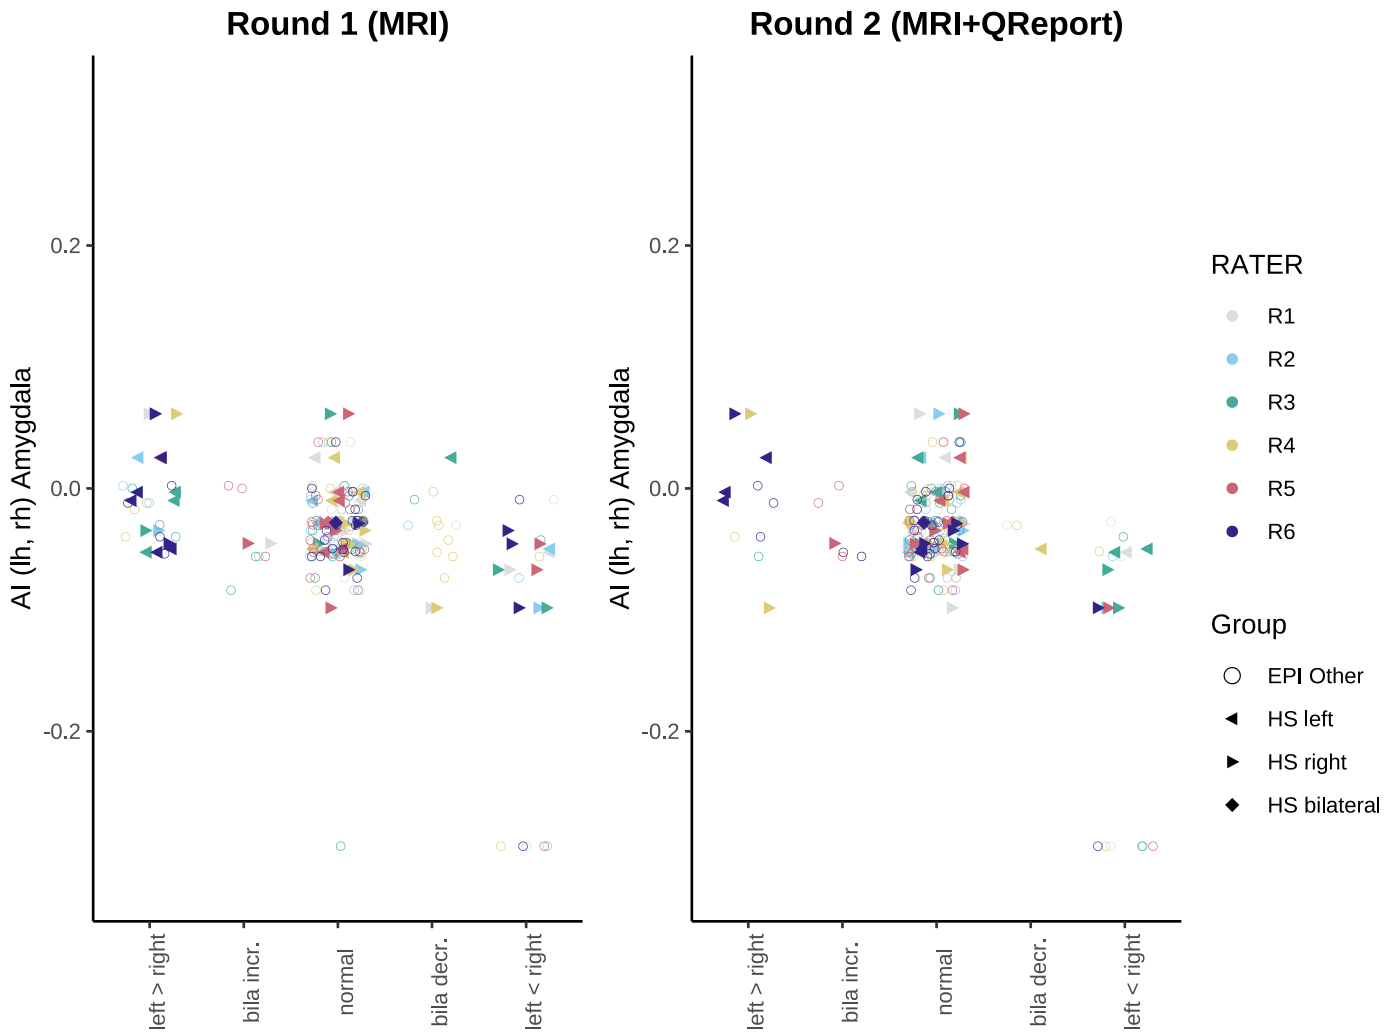

Figure S10: Ratings of the **amygdala volumes** on the x-axis plotted against the asymmetry index (AI) on the y-axis. The symbols are shown with horizontal jitter for better readability.

| Round 1 (MRI)       |           |         |          |              | Round 2 (MRI+QReport) |           |         |          |              |
|---------------------|-----------|---------|----------|--------------|-----------------------|-----------|---------|----------|--------------|
|                     | EPI Other | HS left | HS right | HS bilateral |                       | EPI Other | HS left | HS right | HS bilateral |
| <i>EPI Other</i>    | 126       | 1       | 14       | 1            | <i>EPI Other</i>      | 149       | 3       | 14       | 0            |
| <i>HS left</i>      | 22        | 29      | 0        | 0            | <i>HS left</i>        | 12        | 26      | 0        | 0            |
| <i>HS right</i>     | 10        | 0       | 26       | 0            | <i>HS right</i>       | 0         | 1       | 26       | 0            |
| <i>HS bilateral</i> | 4         | 0       | 2        | 5            | <i>HS bilateral</i>   | 1         | 0       | 2        | 6            |

Figure S11: Confusion matrices of the ratings, pooled across all six raters. Their ratings appear in the rows and ground truth in the columns. In the first round, a total of 36 cases were wrongly rated as HS (22  $\times$  left, 10  $\times$  right, 4  $\times$  bilateral), whereas this reduced to 13 in the second round (12  $\times$  left, 1  $\times$  bilateral).
